# Supplementary material
Source: PubMed Central journal article supplement (PMC7436739)
Supplement: FEE-18-318-s001.pdf [file FEE-18-318-s001.pdf]

**F Kleinschroth and I Kowarik – Supporting information**

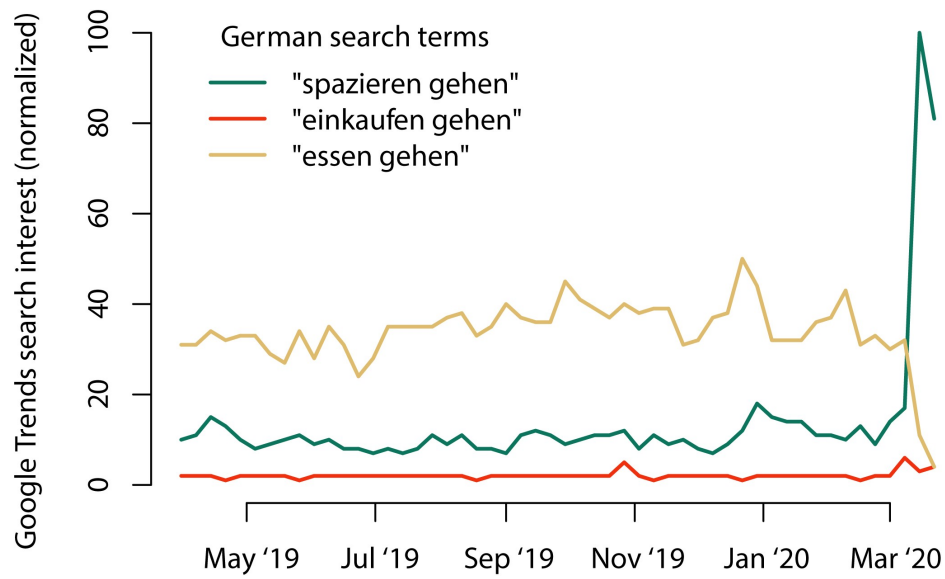

**WebFigure 1.** Proportional interest in global Google search queries with the keywords “spazieren gehen” (going for a walk), “einkaufen gehen” (going shopping), and “essen gehen” (going out to eat) from April 2019 to March 2020.
